# Supplementary material
Source: publisher site journal article supplement (https://www.dovepress.com/get_supplementary_file.php?f=240869.xlsx)
Supplement: Supplementary file 1 [file get_supplementary_file.php]

## Sheet: Sheet1
	Supplemental Table 1. The 41-genes of OncoScreen panel applied in the capture-based targeted DNA sequencing.
	KRAS	NRAS	BRAF	APC	BLM	BMPR1A
	CHEK2	EPCAM	GALNT12	GREM1	MLH1	MSH2
	MSH6	MUTYH	PMS2	POLD1	POLE	PTEN
	SMAD4	STK11	TP53	AKT1	ATM	BRCA1
	BRCA2	CDH1	EGFR	ERBB2	HRAS	KIT
	MET	PDGFRA	PIK3CA	PMS1	PTCH1	SDHB
	SDHC	SCHD	CYP2D6	DPYD	UGT1A1
